# Supplementary material
Source: Springer Nature journal article supplement (https://www.springermedizin.de/resource/supplementary/12990_2009_250_MOESM2_ESM.pdf/9612882)

**(a)**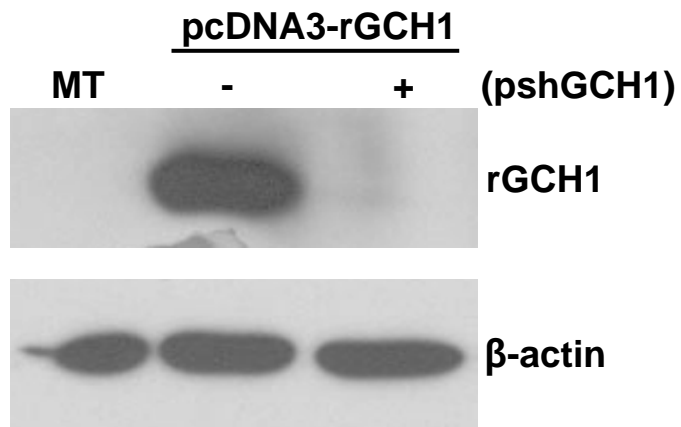**(c)**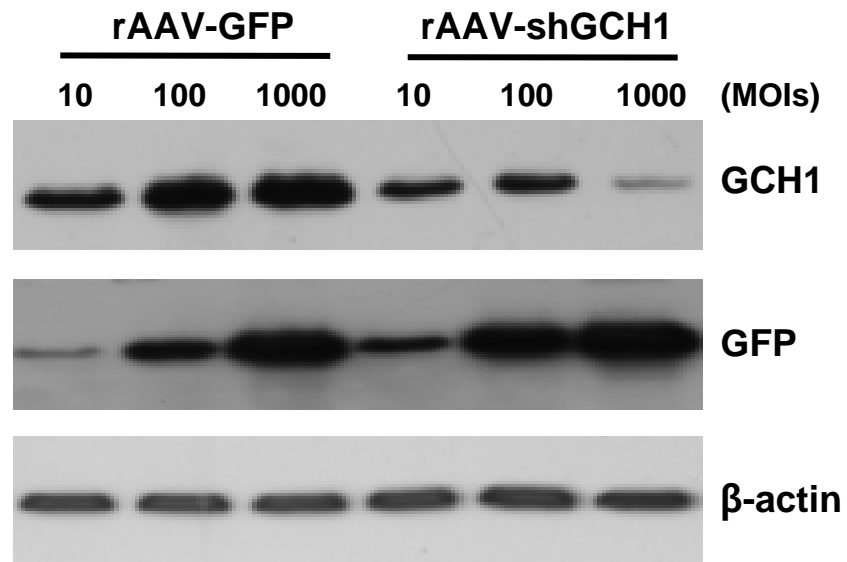**(b)**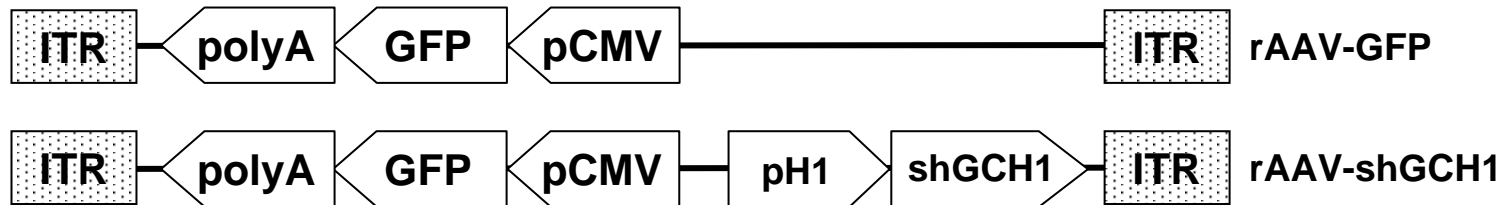

Supplement: MOESM2 [file 9612882]
